# Supplementary material
Source: publisher figshare collection journal article supplement (https://acs.figshare.com/ndownloader/files/3726592)
Supplement: Supplementary file 1 [file 3726592]

# Supporting Information for

## “Covalency-Dependent Vibrational Dynamics in Two-Dimensional Titanium Carbides”

Tao Hu,<sup>†,\*</sup> Minmin Hu,<sup>†,‡</sup> Zhaojin Li,<sup>†,‡</sup> Hui Zhang,<sup>†,‡</sup> Chao Zhang,<sup>†</sup> Jiemin Wang,<sup>†</sup> and Xiaohui Wang<sup>\*,†</sup>

<sup>†</sup>Shenyang National Laboratory for Materials Science, Institute of Metal Research, Chinese

Academy of Sciences, 72 Wenhua Road, Shenyang 110016, China

<sup>‡</sup>University of Chinese Academy of Sciences, Beijing 100049, China

### Experiment and calculation details

#### ***Ab initio* molecular dynamics**

To verify the structural stability of the system at elevated temperatures, we performed *ab initio* molecular dynamics calculations of the free-standing  $\text{Ti}_2\text{CT}_2$  monosheet using the CASTEP code. We used the wave function extrapolation algorithm to cover time periods up to 0.5 ps with the time step of 1 fs. Results are presented in Fig. S1. At 273 K, the  $\text{Ti}_2\text{CT}_2$  monosheet undergoes only minimal changes. Unless at a high temperature of 2000 K, significant structural changes can be found in  $\text{Ti}_2\text{C}(\text{OH})_2$ . The results indicate that the free-standing  $\text{Ti}_2\text{CT}_2$  monosheet has robust stability and can maintain the free-standing structures at ambient temperature.

#### **Preparation of $\text{Ti}_2\text{CT}_2$**

The lamellae for the investigation were synthesized by exfoliating porous  $\text{Ti}_2\text{AlC}$  in hydrochloric acid (HCl) with  $\text{NH}_4\text{HF}_2$  addition. Typically, porous  $\text{Ti}_2\text{AlC}$  (1.08 g) was immersed in a solution containing HCl (36.5%, 25 mL),  $\text{NH}_4\text{HF}_2$  (1.50 g) and deionized water (15 mL). The porous  $\text{Ti}_2\text{AlC}$  was prepared by the method reported previously<sup>1</sup>. The exfoliation process was carried out by immersing the porous  $\text{Ti}_2\text{AlC}$  monolith in the solution for 8 days at room temperature. After that,

the resulting sediment was washed several times using deionized water, followed by immersion in deionized water for one day and subsequent vacuum filtration. The collected powder was dried by cryodesiccation.

#### **XRD and SEM**

The as-synthesized  $\text{Ti}_2\text{CT}_2$  samples were examined by XRD (Rigaku D/max-2400, Tokyo, Japan) with  $\text{Cu K}\alpha$  radiation ( $\lambda = 1.54178 \text{ \AA}$ ) at a scanning speed of  $0.04 \text{ step}^{-1}$ . Morphological studies of the prepared lamella were conducted by SEM (LEO Supra 35, Germany).

#### **Raman spectroscopy**

As an efficient and non-destructive method for surface analysis, nanostructure investigation and vibration analysis, Raman spectroscopy is very sensitive to tiny changes in crystal structure. To gain insight into the structure, we also carried out Raman measurements of experimentally achieved lamellae. The unpolarized Raman spectra of the exfoliated lamellae were collected on a LabRAM HR800 (Jobin Yvon, France) equipped with an air-cooled CCD array detector in the backscattering configuration. For the Raman measurements, a long-working-distance 50 $\times$  objective with numerical aperture of 0.50 was used. A He–Ne laser ( $\lambda = 632.8 \text{ nm}$ ) was used and the laser power was kept below 4 mW on the sample surface to avoid laser-induced heating. A grating of 1800 lines/mm was used for single Raman spectrum measurement to achieve high spectral resolution. The temperature-dependent Raman measurements were carried out on a THMS 600 temperature-controlled stage (Linkam, England). Liquid nitrogen was used as a cooling agent, which was pumped into the stage by a liquid nitrogen cooling pump. The sample temperature was controlled by a programmable THMS 600 temperature-controlled stage with the accuracy of 0.1 K. The sample was cooled to desired temperature and held for 10 minutes before recording Raman spectrum. The testing temperature ranges from  $-190 \text{ }^\circ\text{C}$  to  $10 \text{ }^\circ\text{C}$  with a step of  $50 \text{ }^\circ\text{C}$ .

## Tables

**Table S1. Calculated lattice constants of  $\text{Ti}_2\text{AlC}$  and  $\text{Ti}_3\text{AlC}_2$  with present calculation scheme and data available from previous works**

|                           | Lattice constants | $a$ (Å)              | $c$ (Å)                     |
|---------------------------|-------------------|----------------------|-----------------------------|
| $\text{Ti}_2\text{AlC}$   | Calculated        | 3.06                 | 13.76                       |
|                           | Available data    | $3.06^2, 3.04^3$     | $13.67^2, 13.60^3$          |
| $\text{Ti}_3\text{AlC}_2$ | Calculated        | 3.08                 | 18.67                       |
|                           | Available data    | $3.07^4, 3.08^{5,6}$ | $18.58^4, 18.64^5, 18.65^6$ |

**Table S2. Calculated wavenumbers (in  $\text{cm}^{-1}$ ) of Raman active modes of  $\text{Ti}_2\text{AlC}$  and  $\text{Ti}_3\text{AlC}_2$  with present calculation scheme and data available from previous works**

|                           | Modes                     | $\omega_1$<br>( $E_{2g}$ ) | $\omega_2$<br>( $E_{1g}$ ) | $\omega_3$<br>( $E_{2g}$ ) | $\omega_4$<br>( $E_{1g}$ ) | $\omega_5$<br>( $E_{1g}$ and $E_{2g}$ ) | $\omega_6$<br>( $A_{1g}$ ) |
|---------------------------|---------------------------|----------------------------|----------------------------|----------------------------|----------------------------|-----------------------------------------|----------------------------|
| $\text{Ti}_2\text{AlC}$   | Calculated                | 148                        | 263                        | 266                        | 360                        |                                         |                            |
|                           | Experimental <sup>7</sup> |                            | 270                        | 270                        | 364                        |                                         |                            |
|                           | Experimental <sup>8</sup> | 150                        | 262                        | 268                        | 365                        |                                         |                            |
| $\text{Ti}_3\text{AlC}_2$ | Calculated                | 126                        | 181                        | 197                        | 268                        | 615 and 617                             | 657                        |
|                           | Calculated <sup>9</sup>   | 125                        | 182                        | 197                        | 268                        | 620 and 621                             | 655                        |
|                           | Experimental <sup>7</sup> |                            | 182                        |                            | 270                        |                                         | 658                        |
|                           | Experimental <sup>9</sup> |                            | 183                        | 201                        | 270                        | 632                                     | 663                        |

**Table S3. Cophonicity metric.** Cophonicity ( $C_{\text{ph}}$ , in  $\text{cm}^{-1}$ ) of adjacent atomic pair of  $\text{Ti}_2\text{CT}_2$  and  $\text{Ti}_3\text{C}_2\text{T}_2$  with the same calculation scheme. The smaller is  $C_{\text{ph, A-B}}$ , the higher is the mixing of the A and B contributions to the frequency band, and the two atoms have the same weight in the determination of the modes specific of the considered energy range<sup>10</sup>. The frequency range used to calculate the cophonicity metric is over all the frequencies in the phonon dispersion curve.

|                                    | $C_{\text{ph, Ti-C}}$ | $C_{\text{ph, Ti-T}}$ | $C_{\text{ph, O-H}}$ |                                      | $C_{\text{ph, Ti1-C}}$ | $C_{\text{ph, Ti2-C}}$ | $C_{\text{ph, Ti2-T}}$ | $C_{\text{ph, O-H}}$ |
|------------------------------------|-----------------------|-----------------------|----------------------|--------------------------------------|------------------------|------------------------|------------------------|----------------------|
| $\text{Ti}_2\text{C}$              | 326.97                |                       |                      | $\text{Ti}_3\text{C}_2$              | 284.71                 | 319.80                 |                        |                      |
| $\text{Ti}_2\text{CO}_2$           | 311.29                | 178.92                |                      | $\text{Ti}_3\text{C}_2\text{O}_2$    | 269.73                 | 301.89                 | 169.59                 |                      |
| $\text{Ti}_2\text{CF}_2$           | 348.70                | 1.01                  |                      | $\text{Ti}_3\text{C}_2\text{F}_2$    | 296.15                 | 318.92                 | 11.69                  |                      |
| $\text{Ti}_2\text{C}(\text{OH})_2$ | 337.93                | 132.23(Ti-O)          | 1089.60              | $\text{Ti}_3\text{C}_2(\text{OH})_2$ | 304.48                 | 319.74                 | 124.90(Ti-O)           | 1101.80              |

**Table S4. Speed of sound calculated by the slope of longitudinal acoustic branches near  $\Gamma$  in phonon dispersions of  $\text{Ti}_2\text{C}$  and  $\text{Ti}_2\text{CT}_2$  ( $T = \text{O, F, OH}$ ) monosheets.** The results indicate that the in-plane elastic response of four MXenes is nearly isotropic

|                           | $v_s^{\Gamma-\text{M}}$ (km/s) | $v_s^{\Gamma-\text{K}}$ (km/s) |
|---------------------------|--------------------------------|--------------------------------|
| $\text{Ti}_2\text{C}$     | 7.065                          | 7.096                          |
| $\text{Ti}_2\text{CO}_2$  | 9.263                          | 9.376                          |
| $\text{Ti}_2\text{CF}_2$  | 7.605                          | 7.611                          |
| $\text{Ti}_2\text{COH}_2$ | 7.442                          | 7.448                          |

**Table S5. Assignment of Raman active vibration modes of  $\text{Ti}_2\text{C}$  and  $\text{Ti}_2\text{CT}_2$  ( $T = \text{O}, \text{F}, \text{OH}$ )**

**monosheets**

| Formula             | $\text{Ti}_2\text{C}(\text{OH})_2$                                                                           | $\text{Ti}_2\text{CF}_2$                                                                                    | $\text{Ti}_2\text{CO}_2$                                                                                     | $\text{Ti}_2\text{C}$                                                                                       |
|---------------------|--------------------------------------------------------------------------------------------------------------|-------------------------------------------------------------------------------------------------------------|--------------------------------------------------------------------------------------------------------------|-------------------------------------------------------------------------------------------------------------|
| Modes               |                                                                                                              |                                                                                                             |                                                                                                              |                                                                                                             |
| $\omega_1 (E_g)$    | 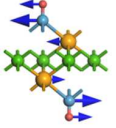<br>192 $\text{cm}^{-1}$    | <br>192 $\text{cm}^{-1}$   | <br>128 $\text{cm}^{-1}$   | <br>236 $\text{cm}^{-1}$ |
| $\omega_2 (A_{1g})$ | <br>288 $\text{cm}^{-1}$    | <br>283 $\text{cm}^{-1}$   | <br>293 $\text{cm}^{-1}$   | <br>333 $\text{cm}^{-1}$ |
| $\omega_3 (E_g)$    | <br>283 $\text{cm}^{-1}$   | <br>254 $\text{cm}^{-1}$  | <br>409 $\text{cm}^{-1}$  |                                                                                                             |
| $\omega_4 (A_{1g})$ | <br>528 $\text{cm}^{-1}$  | <br>505 $\text{cm}^{-1}$ | <br>596 $\text{cm}^{-1}$ |                                                                                                             |
| $\omega_5 (E_g)$    | <br>445 $\text{cm}^{-1}$  |                                                                                                             |                                                                                                              |                                                                                                             |
| $\omega_6 (A_{1g})$ | <br>3707 $\text{cm}^{-1}$ |                                                                                                             |                                                                                                              |                                                                                                             |

**Table S6. Assignment of IR active vibration modes of  $\text{Ti}_2\text{C}$  and  $\text{Ti}_2\text{CT}_2$  ( $T = \text{O}, \text{F}, \text{OH}$ ) monosheets**

| Formula             | $\text{Ti}_2\text{C}(\text{OH})_2$                                                                           | $\text{Ti}_2\text{CF}_2$                                                                                    | $\text{Ti}_2\text{CO}_2$                                                                                     | $\text{Ti}_2\text{C}$                                                                                       |
|---------------------|--------------------------------------------------------------------------------------------------------------|-------------------------------------------------------------------------------------------------------------|--------------------------------------------------------------------------------------------------------------|-------------------------------------------------------------------------------------------------------------|
| Modes               |                                                                                                              |                                                                                                             |                                                                                                              |                                                                                                             |
| $\omega_1 (E_u)$    | 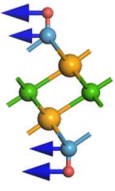<br>286 $\text{cm}^{-1}$    | <br>257 $\text{cm}^{-1}$   | <br>240 $\text{cm}^{-1}$   | <br>637 $\text{cm}^{-1}$ |
| $\omega_2 (A_{2u})$ | <br>489 $\text{cm}^{-1}$    | <br>451 $\text{cm}^{-1}$   | <br>578 $\text{cm}^{-1}$   | <br>520 $\text{cm}^{-1}$ |
| $\omega_3 (E_u)$    | <br>657 $\text{cm}^{-1}$   | <br>669 $\text{cm}^{-1}$   | <br>505 $\text{cm}^{-1}$  |                                                                                                             |
| $\omega_4 (A_{2u})$ | <br>633 $\text{cm}^{-1}$  | <br>666 $\text{cm}^{-1}$ | <br>741 $\text{cm}^{-1}$ |                                                                                                             |
| $\omega_5 (E_u)$    | <br>444 $\text{cm}^{-1}$  |                                                                                                             |                                                                                                              |                                                                                                             |
| $\omega_6 (A_{2u})$ | <br>3701 $\text{cm}^{-1}$ |                                                                                                             |                                                                                                              |                                                                                                             |

**Table S7. Covalency metric.** Bond Covalency (in eV) of adjacent atomic pair of  $\text{Ti}_2\text{CT}_2$  and  $\text{Ti}_3\text{C}_2\text{T}_2$  with same calculation scheme. The greater the value of  $C_{\text{A-B}}$ , the higher the overlap of the selected atomic bands, and thus the electron density described by those orbitals gives a more covalent A–B bond. The quantity  $C_{\text{A-B}}$  is denoted as the covalency of the A–B bond, which is specified in units of  $\text{eV}^{10,11}$ . The energy range used to calculate the covalency metric is over all the energies in the electronic band structure, specifically,  $[-60, 15]$  eV.

|                                    | $C_{\text{Ti-C}}$ | $C_{\text{Ti-T}}$ | $C_{\text{O-H}}$ |                                      | $C_{\text{Ti1-C}}$ | $C_{\text{Ti2-C}}$ | $C_{\text{Ti2-T}}$ | $C_{\text{O-H}}$ |
|------------------------------------|-------------------|-------------------|------------------|--------------------------------------|--------------------|--------------------|--------------------|------------------|
| $\text{Ti}_2\text{C}$              | –10.72            |                   |                  | $\text{Ti}_3\text{C}_2$              | –13.14             | –11.53             |                    |                  |
| $\text{Ti}_2\text{CO}_2$           | –12.33            | –7.75             |                  | $\text{Ti}_3\text{C}_2\text{O}_2$    | –13.89             | –13.82             | –10.34             |                  |
| $\text{Ti}_2\text{CF}_2$           | –11.23            | –3.72             |                  | $\text{Ti}_3\text{C}_2\text{F}_2$    | –13.66             | –12.84             | –6.16              |                  |
| $\text{Ti}_2\text{C}(\text{OH})_2$ | –12.27            | –6.78(Ti–O)       | –4.67            | $\text{Ti}_3\text{C}_2(\text{OH})_2$ | –13.24             | –12.92             | –7.94(Ti2–O)       | –3.31            |

## Figures

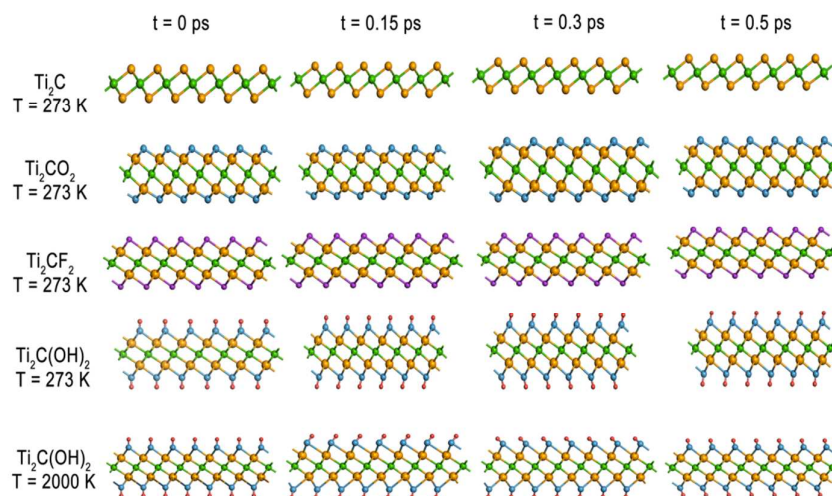

**Figure S1.** Snap shots of canonical molecular dynamics simulations depicting structural changes in a free-standing  $\text{Ti}_2\text{CT}_2$  monosheet at different temperatures. A  $6 \times 6 \times 1$  supercell was used.

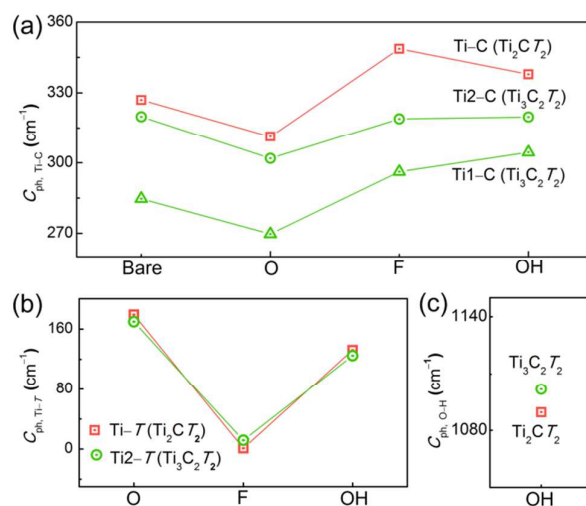

**Figure S2.** Cophonicity of  $\text{Ti}_2\text{CT}_2$  and  $\text{Ti}_3\text{C}_2\text{T}_2$  monosheet. (a) Ti-C, (b) Ti-T and (c) O-H.

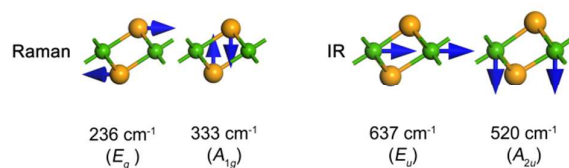

**Figure S3.** Schematics of Raman and infrared active vibration modes of  $\text{Ti}_2\text{C}$  monosheet.



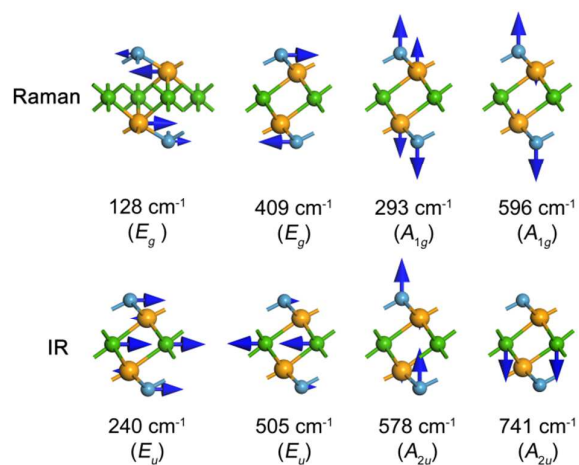

**Figure S4.** Schematics of Raman and infrared active vibration modes of  $\text{Ti}_2\text{CO}_2$  monosheet.

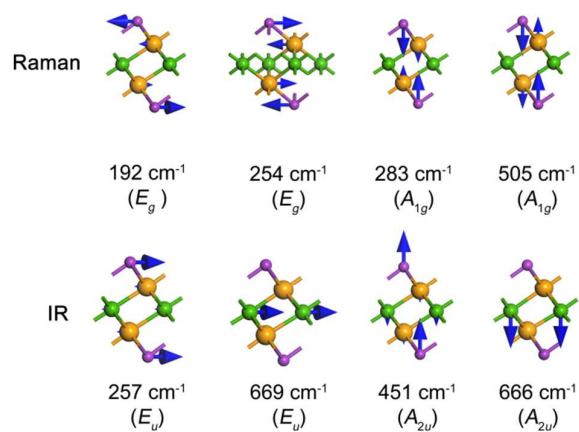

**Figure S5.** Schematics of Raman and infrared active vibration modes of  $\text{Ti}_2\text{CF}_2$  monosheet.

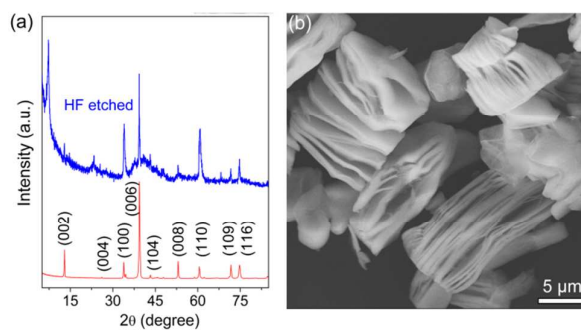

**Figure S6.** (a) XRD pattern for  $\text{Ti}_2\text{AlC}$  before and after HF treatment; (b) SEM image of experimentally obtained lamellae. (b) shows a 2000 $\times$  magnitude image of the lamellae.

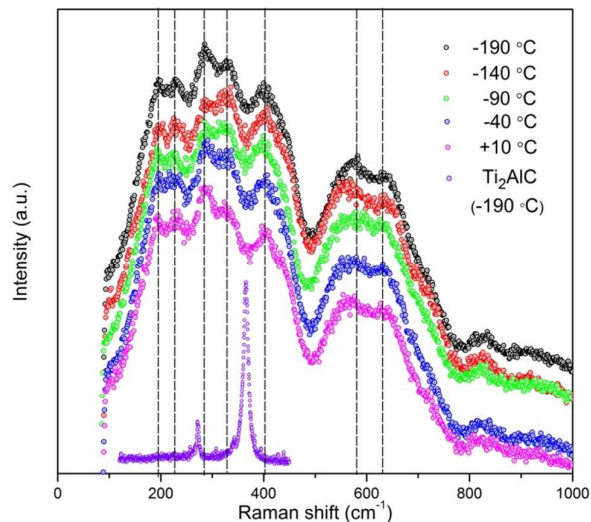

**Figure S7.** Micro Raman spectra of exfoliated  $\text{Ti}_2\text{CT}_2$  lamellae at various temperatures. For the sake of comparison, Raman spectrum of  $\text{Ti}_2\text{AlC}$  at  $-190^\circ\text{C}$  is also included. Note that all the Raman peaks of  $\text{Ti}_2\text{AlC}$  are well below  $500\text{ cm}^{-1}$  from both theoretical (See Table S2) and experimental aspects, while the exfoliated  $\text{Ti}_2\text{CT}_2$  lamellae possess several obvious bands above  $500\text{ cm}^{-1}$ .

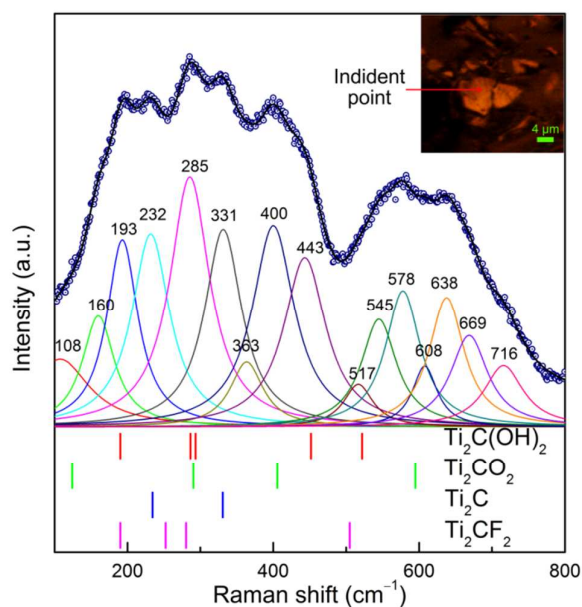

**Figure S8.** Micro Raman spectrum of experimentally obtained lamellae. Calculated Raman active frequencies of  $\text{Ti}_2\text{C}$  and  $\text{Ti}_2\text{CT}_2$  monosheets are also included. Inset shows image of lamellae. The bands at  $638$ ,  $669$  and  $716\text{ cm}^{-1}$  probably stems from the changes in symmetry with increasing  $\text{Ti}_2\text{CT}_2$  layers, which makes IR active modes  $633\text{ (A}_{2u})$ ,  $666\text{ (A}_{2u})$  and  $741\text{ (A}_{2u})\text{ cm}^{-1}$  change to Raman active modes, as in  $\text{MoS}_2$ .<sup>12</sup>

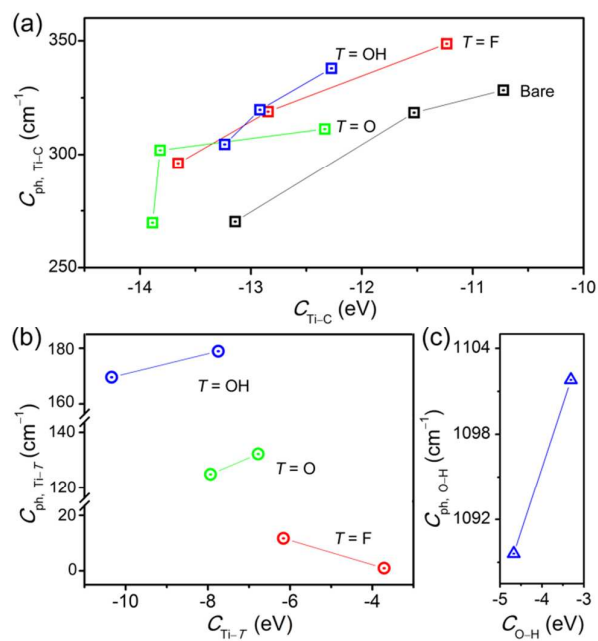

**Figure S9.** Correlation between covalency and cophonicity of (a) Ti-C, (b) Ti-T and (c) O-H atomic pair. The plot generally shows a positive correlation between covalency and cophonicity in the studied system except the Ti-F atomic pair in  $\text{Ti}_{n+1}\text{C}_n\text{F}_2$  monosheet.

- (1) Wang, X. H.; Zhou, Y. C. Solid-Liquid Reaction Synthesis and Simultaneous Densification of Polycrystalline  $\text{Ti}_2\text{AlC}$ . *Z. Metallkd.* **2002**, *93*, 66–71.
- (2) Sun, Z. M.; Ahuja, R.; Li, S.; Schneider, J. M. Structure and Bulk Modulus of  $M_2\text{AlC}$  ( $M = \text{Ti, V, and Cr}$ ). *Appl. Phys. Lett.* **2003**, *83*, 899.
- (3) Schuster, J. C.; Nowotny, H.; Vaccaro, C. The Ternary-Systems: Cr-Al-C, V-Al-C, and Ti-Al-C and the Behavior of H-Phases ( $M_2\text{AlC}$ ). *J. Solid State Chem.* **1980**, *32*, 213–219.
- (4) Wang, X. H.; Zhou, Y. C. Layered Machinable and Electrically Conductive  $\text{Ti}_2\text{AlC}$  and  $\text{Ti}_3\text{AlC}_2$  Ceramics: A Review. *J. Mater. Sci. Tech.* **2010**, *26*, 385–416.
- (5) Xie, Y.; Kent, P. R. C. Hybrid Density Functional Study of Structural and Electronic Properties of Functionalized  $\text{Ti}_{n+1}\text{X}_n$  ( $X = \text{C, N}$ ) Monolayers. *Phys. Rev. B* **2013**, *87*, 235441.
- (6) Shein, I. R.; Ivanovskii, A. L. Graphene-Like Titanium Carbides and Nitrides  $\text{Ti}_{n+1}\text{C}_n$ ,  $\text{Ti}_{n+1}\text{N}_n$  ( $n = 1, 2$ , and 3) from De-Intercalated MAX Phases: First-Principles Probing of Their Structural, Electronic Properties and Relative Stability. *Computational Materials Science* **2012**, *65*, 104–114.
- (7) Zhang, H.; Wang, X. H.; Xiang, H. M.; Li, Z. J.; Zhou, Y. C. Micro-Raman Spectroscopic Study of Nanolaminated  $\text{Ti}_5\text{Al}_2\text{C}_3$ . *Appl. Phys. Lett.* **2014**, *104*, 131903.
- (8) Spanier, J. E.; Gupta, S.; Amer, M.; Barsoum, M. W. Vibrational Behavior of The  $M_{n+1}\text{AX}_n$  phases from First-Order Raman Scattering ( $M = \text{Ti, V, Cr, A = Si, X = C, N}$ ). *Phys. Rev. B* **2005**, *71*, 012103.
- (9) Presser, V.; Naguib, M.; Chaput, L.; Togo, A.; Hug, G.; Barsoum, M. W. First-Order Raman Scattering of the MAX Phases:  $\text{Ti}_2\text{AlN}$ ,  $\text{Ti}_2\text{AlC}_{0.5}\text{N}_{0.5}$ ,  $\text{Ti}_2\text{AlC}$ ,  $(\text{Ti}_{0.5}\text{V}_{0.5})_2\text{AlC}$ ,  $\text{V}_2\text{AlC}$ ,  $\text{Ti}_3\text{AlC}_2$ , and  $\text{Ti}_3\text{GeC}_2$ . *J. Raman Spectrosc.* **2012**, *43*, 168–172.
- (10) Cammarata, A.; Polcar, T. Tailoring Nanoscale Friction in  $\text{MX}_2$  Transition Metal Dichalcogenides. *Inorg. Chem.* **2015**, *54*, 5739–5744.
- (11) Cammarata, A.; Rondinelli, J. M. Covalent Dependence of Octahedral Rotations in Orthorhombic Perovskite Oxides. *J. Chem. Phys.* **2014**, *141*, 114704.
- (12) Staiger, M.; Gillen, R.; Scheuschner, N.; Ochedowski, O.; Kampmann, F.; Schleberger, M.; Thomsen, C.; Maultzsch, J. Splitting of Monolayer out-of-Plane  $A_1'$  Raman Mode in Few-Layer  $\text{WS}_2$ . *Phys. Rev. B* **2015**, *91*, 195419.
